# Supplementary material for: Engineering of CD19 Antibodies: A CD19-TRAIL Fusion Construct Specifically Induces Apoptosis in B-Cell Precursor Acute Lymphoblastic Leukemia (BCP-ALL) Cells In Vivo
Source: MDPI journal article supplement (doi:10.3390/jcm10122634), 2021-06-15
Supplement: s1 [file s1]

(A)

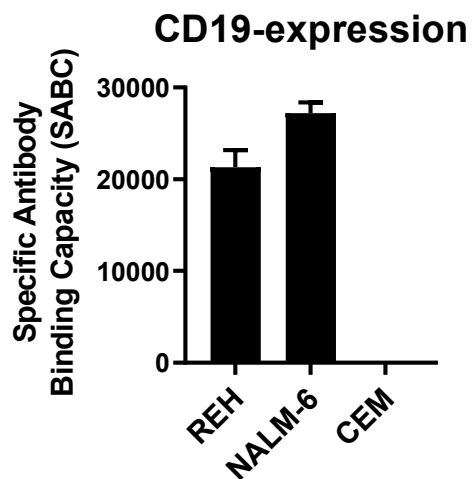

(B)

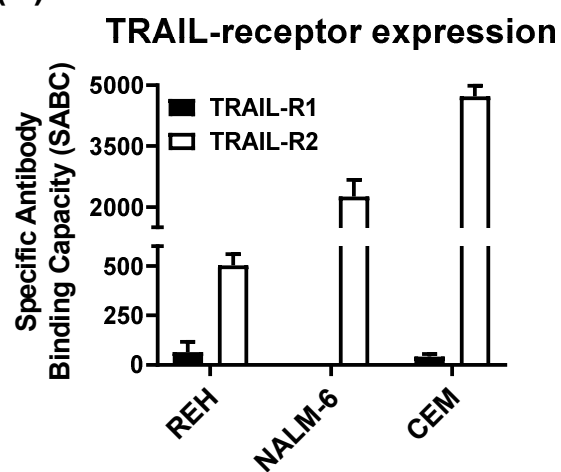

**Supplementary Figure S1. Expression profile of CD19 and TRAIL receptors (TRAIL-R1/TRAIL-R2) on leukemic cell lines.** A-B) Surface expression of (A) CD19 or (B) TRAIL-R1 or TRAIL-R2 was quantified using the QIFIKIT® (Agilent Technologies). Data show mean values  $\pm$  SEM of n=3 independent experiments .

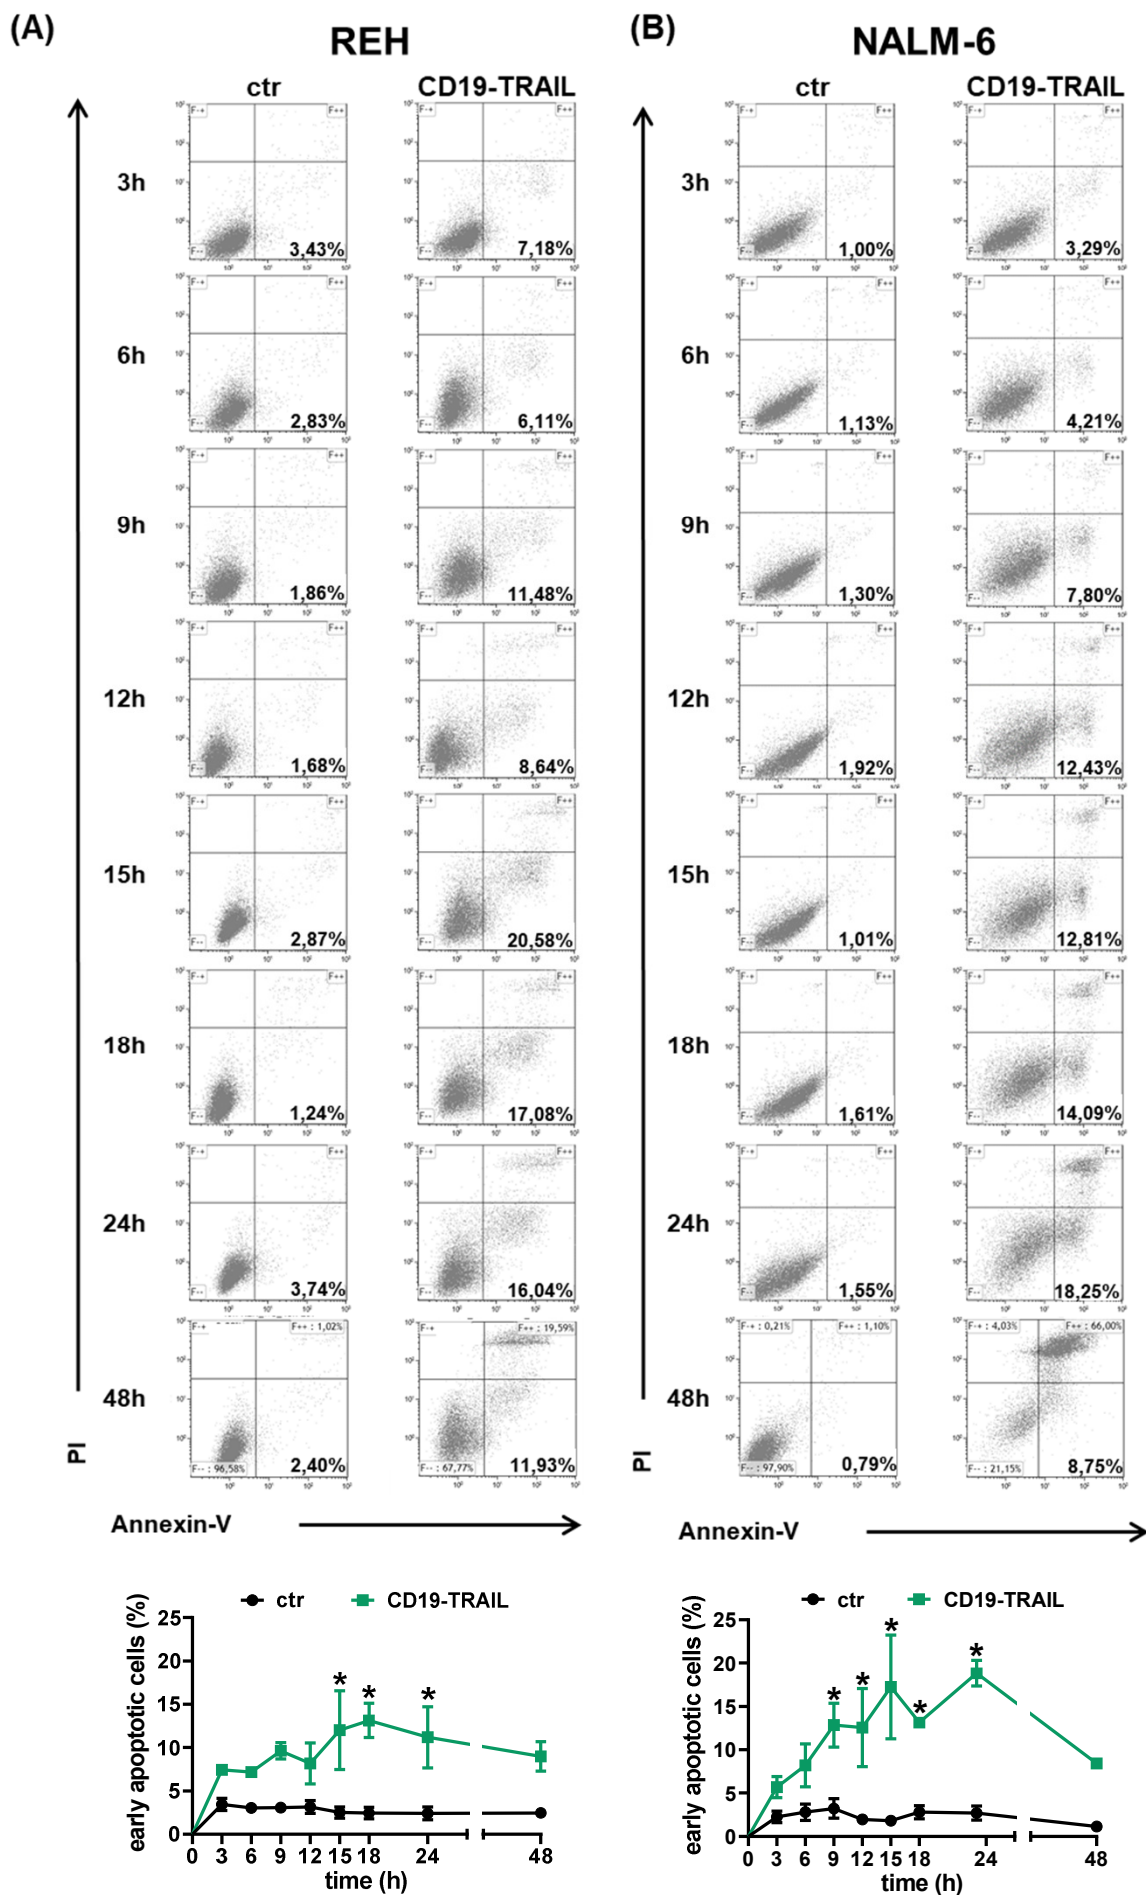

(A)

REH

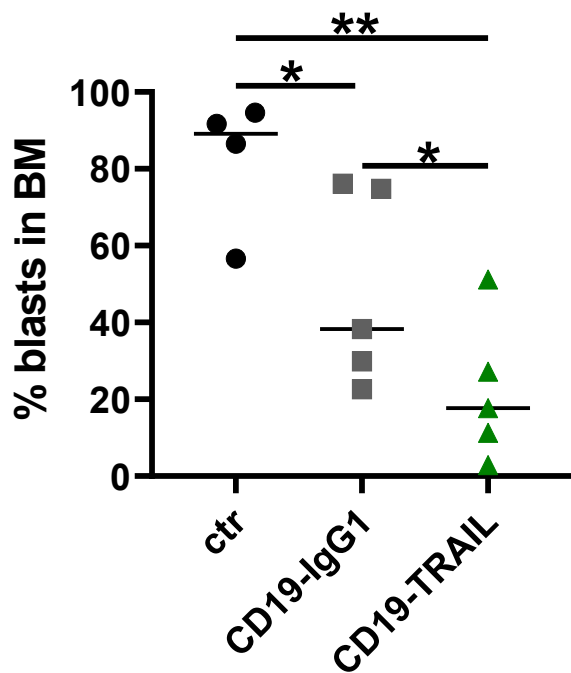

(B)

NALM-6

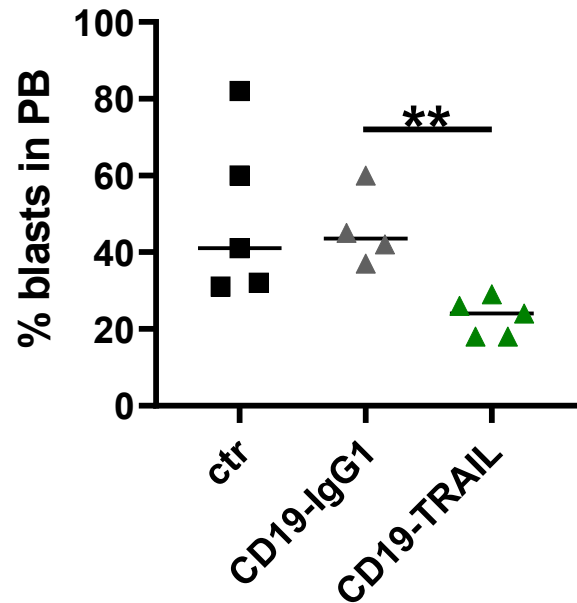

(C)

CD19-expression

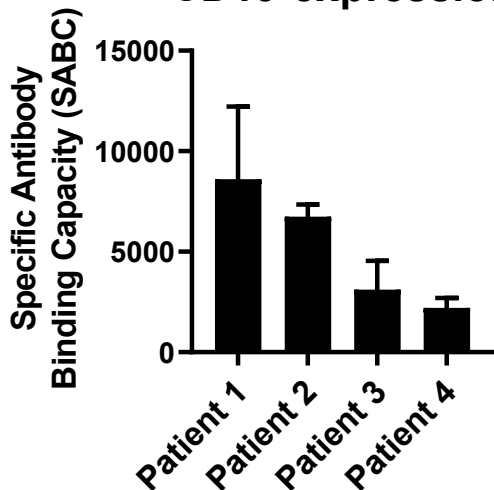

(D)

TRAIL-receptor expression

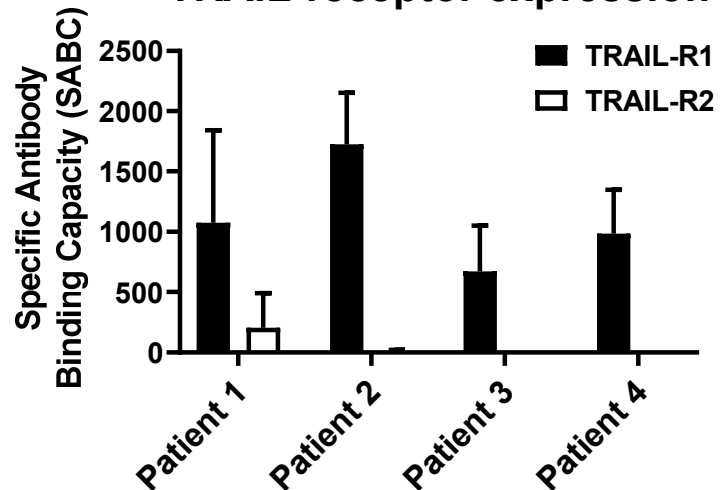

**Supplementary Figure S3. CD19-TRAIL eradicates BCP-ALL cells in vivo.** A-B) NSG mice were injected with  $5 \times 10^5$  REH or NALM-6 cells ( $n=5$  per group) (day 0). On days+1, +3, +6, +10, +13 and every 7 days thereafter mice were treated with 1.5 mg/kg of CD19-Ig G1 or CD19-TRAIL intravenously or left untreated (ctr). A) On day +32, engraftment of REH cells was assessed via flow cytometry detection of hCD45+/mCD45-cells in bone marrow (BM) aspirates. Depicted are relative leukemia cell counts of  $n=5$  animals, one-tailed Mann-Whitney-Test. B) Relative counts of leukemic cells in the peripheral blood (PB) of animals injected with NALM-6 cells and treated with CD19-IgG1 or CD19-TRAIL as of day 21 post injection and ctr animals upon sacrifice (day 17). Due to the lack of CD45 in NALM-6 cells and blocking of the CD19 epitope by CD19-IgG1 or CD19-TRAIL, *in vivo* engraftment of NALM-6 cells was assessed via morphological differential blood count analysis. Depicted are relative leukemia cells counts of  $n=5$  animals, one-tailed Mann-Whitney-Test. \* $P < 0.05$ , \*\* $P < 0.01$ . C-D) Surface expression of (C) CD19 or (D) TRAIL-R1 or TRAIL-R2 was quantified using the QIFIKIT® (Agilent Technologies). Data show mean values  $\pm$  SEM of  $n=3$  independent experiments.

(A)

| CD19-TRAIL<br>[nM] | Venetoclax<br>[nM] | Effect (%) | CI Value |
|--------------------|--------------------|------------|----------|
| 1,5                | 150                | 99         | 0.27692  |
| 0,3                | 30                 | 95         | 0.25490  |
| 0,06               | 6                  | 81         | 0.23330  |
| 0,012              | 1,2                | 46         | 0.27403  |
| 0,0024             | 0,24               | 13         | 2.23561  |

(B)

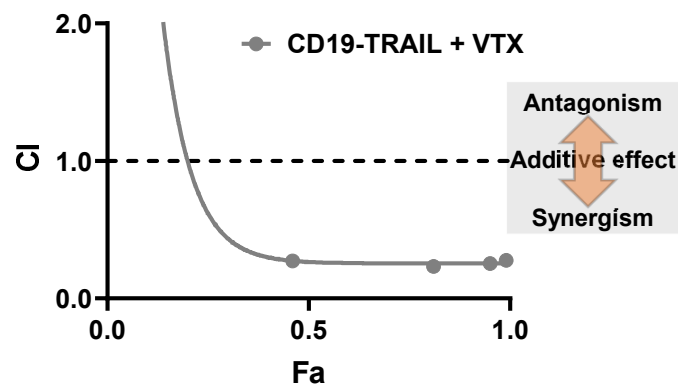

**Supplementary Figure S4. ALL-killing effect of CD19-TRAIL is synergistically enhanced by Venetoclax** A) REH cells were treated with escalating concentrations of CD19-TRAIL, the BCL-2 inhibitor Venetoclax (VTX) or the combination of both. The combination index (CI) values for each individual combination data point were calculated.  $CI < 1$  represents synergism,  $CI = 1$  indicates additive effect and  $CI > 1$  represents antagonism. B) CI plot generated by Compusyn Software where the CI is plotted as a function of the fraction affected (Fa) for the additive anti-proliferative effects of CD19-TRAIL and VTX. Data are presented as mean values from  $n = 3$  individual experiments.

**Supplementary Table S1. Clinical characteristics of BCP-ALL patients xenografted in NSG mice**

| Patient Data |         |     |                    |                       |                 |                | Xenograft Data |                 |             |                 |                 |
|--------------|---------|-----|--------------------|-----------------------|-----------------|----------------|----------------|-----------------|-------------|-----------------|-----------------|
| Patient      | Age (y) | Sex | WBC                | MRD Risk <sup>1</sup> | PR <sup>2</sup> | Cytogenetic    | % BM blasts    | Survival (days) | CD19 (SABC) | TRAIL-R1 (SABC) | TRAIL-R2 (SABC) |
| 1            | 16.9    | F   | ≥10.000<br><50.000 | HR                    | G               | BCR-ABL+       | 98, 99         | 124, 73         | 8603        | 1076            | 206             |
| 2            | 9.4     | F   | ≥100.000           | SR                    | G               | BCR-ABL+       | 96,99          | 141, 154        | 6738        | 1726            | 0               |
| 3            | 10.3    | M   | <10.000            | IR                    | G               | E2A-PBX1+      | 92,94          | 53, 53          | 3125        | 673             | 0               |
| 4            | 0.3     | F   | ≥100.000           | N/A                   | G               | MLL-rearranged | 99, 87         | 111, 50         | 2210        | 985             | 0               |

<sup>1</sup>Risk stratification according to MRD risk groups: MRD-SR: TP1+2 negative, MRD-IR: TP1 and/or TP2 <10<sup>-3</sup>, MRD-HR: TP2 ≥ 10<sup>-3</sup>.

<sup>2</sup>PR: Prednisone response; G: good (less than 1000 leukemic blasts/μl blood on treatment day 8); P: poor (more than 1000/μl on day 8)

N/A Data not available

WBC: White blood cell count at initial diagnosis

SABC: Specific antibody binding capacity
